# Supplementary material for: Keggin ion-mediated synthesis of aqueous phase-pure Au@Pd and Au@Pt core–shell nanoparticles
Source: Royal Society of Chemistry journal article supplement (doi:10.1039/b409033k), 2004-01-01
Supplement: b409033k.doc [file b409033k.doc]

**Supporting Information S1:** W 4f core level spectra recorded from the PTA-capped

nanoparticles (curve 1), Au-Pd (curve 2) and Au-Pt (curve 3) core-shell

nanoparticles. The spectra have been shifted vertically for clarity. The

spectrum in curve 1 has been decomposed into a spin-orbit pair; the

other two spectra could also be stripped into single spin-orbit pair but

have not been shown for clarity.

**Supporting information**


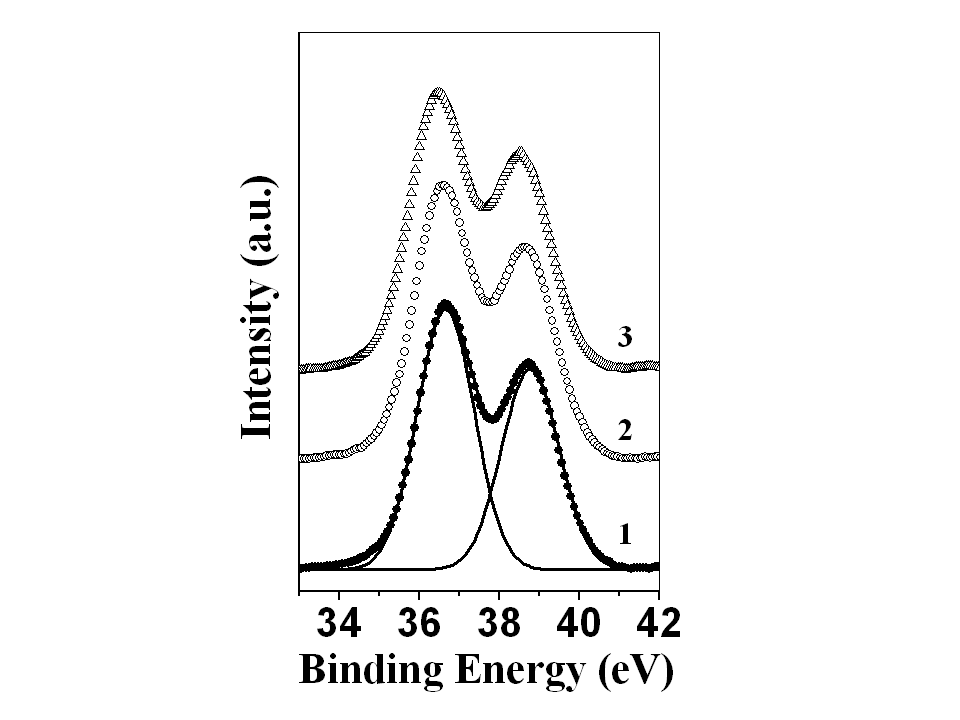


**S1.**
